# MetaCoAG: Binning Metagenomic Contigs via Composition, Coverage and Assembly Graphs

Vijini Mallawaarachchi<sup>1</sup> and Yu Lin<sup>1,\*</sup>

<sup>1</sup>School of Computing, Australian National University, Canberra, ACT 2600, Australia

\*[yu.lin@anu.edu.au](mailto:yu.lin@anu.edu.au)

## ABSTRACT

Metagenomics binning has allowed us to study and characterize various genetic material of different species and gain insights into microbial communities. While existing binning tools bin metagenomics de novo assemblies, they do not make use of the assembly graphs that produce such assemblies. Here we propose MetaCoAG, a tool that utilizes assembly graphs with the composition and coverage information to bin metagenomic contigs. MetaCoAG uses single-copy marker genes to estimate the number of initial bins, assigns contigs into bins iteratively and adjusts the number of bins dynamically throughout the binning process. Experimental results on simulated and real datasets demonstrate that MetaCoAG significantly outperforms state-of-the-art binning tools, producing more high-quality bins than the second-best tool, with an average median F1-score of 88.40%. To the best of our knowledge, MetaCoAG is the first stand-alone binning tool to make direct use of the assembly graph information. MetaCoAG is available at <https://github.com/Vini2/MetaCoAG>.

The development of high-throughput sequencing technologies has paved the way for metagenomics studies to analyze microbial communities without the need for culturing, especially in large scale metagenomics studies such as the Human Microbiome Project<sup>1</sup>. These microbial communities consist of a large number of micro-organisms including bacteria. Samples obtained directly from the environment can be sequenced to obtain large amounts of sequencing reads. In order to characterize the composition of a sample and the functions of the microbes present, we perform *metagenomics binning* where we cluster sequences into bins that represent different taxonomic groups<sup>2</sup>.

Next-generation sequencing (NGS) technologies such as Illumina allow us to sequence microbial communities and obtain highly accurate short sequences called *reads*. These reads can be binned<sup>3-9</sup> prior to assembly, but results can be less reliable due to their short lengths<sup>10</sup>. Hence, a widely used pipeline for metagenomics analysis is to first assemble reads into longer sequences called *contigs* and then bin these assembled contigs into groups that belong to different taxonomic groups<sup>2</sup>. Current contig-binning approaches fall into two broad categories<sup>11</sup>: (1) *reference-based* binning approaches<sup>7,12-14</sup> which classify contigs into known taxonomic groups by comparing against a reference database and (2) *reference-free* binning approaches which cluster contigs into unlabeled bins based on genomic features of these contigs. Reference-free binning approaches<sup>2</sup> have become more popular as they enable the identification of new species that are not available in the current databases. Reference-free contig-binning tools mainly make use of two features to perform binning: (1) *composition*, obtained as normalized frequencies of oligonucleotides of length  $k$  (referred to as  $k$ -mers) and (2) *coverage*, considered as the average number of reads that map to each base of the contig. These tools achieve improved performance in binning contigs by combining both the composition and the coverage information. However, it still remains challenging for these binning tools to accurately reconstruct microbial genomes of species with similar composition and coverage profiles.

Another challenge in metagenomics binning is to estimate the number of species present in a given sample. Recent binning tools have made use of *single-copy marker genes* to estimate the number of species. These single-copy marker genes appear only once in a bacterial genome and are conserved in the majority of bacterial genomes<sup>15-17</sup>. Hence, the presence of single-copy marker genes can be used to estimate the genome completeness and level of purity of bins. In tools such as MaxBin/MaxBin2<sup>17,18</sup>, only one marker gene is utilized to estimate the number of initial bins which may lead to an underestimation of the number of species. Hence, it is worth investigating how to make use of multiple single-copy marker genes together to obtain a better estimate for the number of bins and to explore more features of contigs that can improve the binning result.

Contigs are obtained by assembling reads into longer sequences, and there are many tools to perform assembly. Most existing metagenomic assemblers<sup>19-21</sup> use *assembly graphs* as the key data structure (e.g., simplified de Bruijn graph<sup>22</sup>) to assemble reads into contigs. Previous studies indicated that contigs connected to each other in the assembly graph are more likely to belong to the same taxonomic group<sup>23,24</sup>. Although popular metagenomic assemblers such as metaSPAdes<sup>21</sup> output contigs along with their connection information in the assembly graph, most existing binning tools ignore the valuable connection

information between contigs. More recently, tools such as GraphBin<sup>24</sup>, GraphBin2<sup>25</sup>, METAMVGL<sup>26</sup> and STRONG<sup>27</sup> have been developed to refine existing binning results and resolve strains using assembly graphs. These tools rely upon the bins produced by an existing binning tool and cannot dynamically adjust the number of bins. Although these tools achieve improved binning performance, they still require an initial binning result obtained from other existing binning tools and thus cannot be directly applied to bin contigs. Hence, there is a need for a stand-alone contig-binning tool that makes use of the connection information found in the assembly graph.

In this paper, we introduce MetaCoAG, a reference-free stand-alone approach for binning metagenomic contigs. In addition to composition and abundance information, MetaCoAG also makes use of the connectivity information from assembly graphs to bin contigs. More specifically, MetaCoAG estimates the number of initial bins from frequency histogram plots of all single-copy marker genes, assigns contigs into bins iteratively and adjusts the number of bins dynamically through graph-matching algorithms, and bins the remaining contigs using a label propagation method based on the assembly graph. To the best of our knowledge, MetaCoAG is the first stand-alone contig-binning tool to make direct use of the assembly graph information. We benchmark MetaCoAG against state-of-the-art contig-binning tools using simulated and real datasets. The experimental results show that MetaCoAG significantly outperforms other contig-binning tools, *e.g.*, improving the completeness of bins while maintaining high purity levels and producing more high-quality bins.

## Results

### Overview of MetaCoAG Workflow

Figure 1 shows the overall workflow of MetaCoAG. A preprocessing step (step 0 in Fig. 1) is carried out to assemble the reads into contigs and obtain the assembly graph. Metagenomic assemblers first use graph models to connect overlapping reads or *k*-mers and infer contigs as non-branching paths. After graph simplification, the vertices represent contigs and edges represent connections between contigs in the assembly graph.

Similar to previous approaches<sup>17,18,28</sup>, MetaCoAG uses 107 single-copy marker genes to distinguish contigs belonging to different species. MetaCoAG first identifies a list of contigs that contain each single-copy marker gene (step 1 in Fig. 1). MetaCoAG further counts the number of contigs containing each single-copy marker gene and estimates the initial number of bins (step 2 in Fig. 1). Then, MetaCoAG applies a graph-matching algorithm to assign contigs that contain single-copy marker genes into bins iteratively and adjust the number of bins dynamically (step 3 in Fig. 1). Finally, MetaCoAG bins the remaining contigs using label propagation algorithms based on the assembly graph (step 4 in Fig. 1), performs a postprocessing step, and outputs the bins along with their corresponding contigs. Each step of MetaCoAG is explained in detail in the Methods section.

### Benchmarks using simHC+ Dataset

We first benchmarked MetaCoAG against two popular contig-binning tools, MaxBin2<sup>18</sup> and MetaBAT2<sup>29</sup> on the simulated dataset **simHC+**<sup>17</sup> which consists of 100 bacterial genomes (please refer to Supplementary Data 1 Table 1 for further details of the simHC+ dataset)<sup>1</sup>. We evaluated the binning results of the simHC+ dataset produced by all the tools using the two popular evaluation tools AMBER<sup>31</sup> and CheckM<sup>32</sup>. AMBER assesses the quality of bins based on the ground truth annotations provided and CheckM assesses the quality of bins based on sets of single-copy marker genes. We analyzed the purity, completeness and F1-score of the binning results calculated by AMBER (at the nucleotide level) and CheckM. MetaCoAG has recovered bins with a better trade-off between purity and completeness when compared to other binning tools (Fig. 2 (a)) with an average purity of 91.07% and an average completeness of 82.73% from AMBER and an average purity of 97.55% and an average completeness of 87.17% from CheckM. This better trade-off is demonstrated from the best F1-score results produced by MetaCoAG with a median F1-score of 95.69% from AMBER (Fig. 2 (b)) and a median F1-score of 98.48% from CheckM (Fig. 2 (c)) when compared with other binning tools. Even though MetaBAT2 has recorded the highest average purity (98.30% from AMBER and 100.0% from CheckM), it has a very low average completeness (13.02% from AMBER and 29.59% from CheckM) because all contigs shorter than 1,500bp (*i.e.* 60.49% of the contigs in the entire dataset) were discarded. Please refer to Supplementary Data 1 Table 2 for the exact values of the AMBER and CheckM results of the simHC+ dataset. We also used CheckM to count the number of high-, medium- and low-quality bins produced by all the binning tools for the simHC+ dataset (Supplementary Data 1 Table 6). MetaCoAG has recovered the highest number of high-quality bins (69 bins) and the lowest number of low-quality bins (13 bins) for the simHC+ dataset.

We further used AMBER to analyze the species recovered by each binning tool for the simHC+ dataset. Out of the 100 species, MetaCoAG was able to recover more species than other tools (Supplementary Data 1 Table 4), thanks to its adaptable bin-breaking mechanism that allows to separate more species rather than combining them together. We also analyzed the F1-score of these recovered species (Supplementary Data 1 Fig. 2), and observed that MetaCoAG has recovered more species

<sup>1</sup>Please note that the recently published tool Vamb<sup>30</sup> was not used to evaluate the simHC+ dataset as the number of contigs was less than the number recommended by the authors (<https://github.com/RasmussenLab/vamb#recommended-workflow>).

90 with high F1-score than the other binning tools (Please refer to Supplementary Data 1 Table 4 for comparison of the F1-score of  
91 the species recovered by MaxBin2, MetaBAT2 and MetaCoAG). Many existing binning tools assume that the oligonucleotide  
92 composition and coverage are conserved across the genome. Hence it is challenging for such tools to bin species with high  
93 variance in oligonucleotide composition and/or coverage. Moreover, these tools face difficulties when recovering species  
94 with low abundance due to the rare occurrence of species-specific signals. In Fig. 3, we visualize and compare the binning  
95 results of MaxBin2 and MetaCoAG<sup>2</sup> against the ground truth for the following species, *Pseudomonas putida* and *Arthrobacter*  
96 *arilaitensis*. The species *Pseudomonas putida* has a high variance in oligonucleotide composition (standard deviation > 0.015  
97 for the tetranucleotide composition of its contigs) and thus MaxBin2 has split this species into multiple bins incorrectly (refer  
98 to Fig. 3 (a)). The species *Arthrobacter arilaitensis* has a high variance in genome coverage (standard deviation > 50× for the  
99 coverages of its contigs) and thus MaxBin2 has mis-binned some high-coverage contigs into other species with high coverage  
100 (refer to Fig. 3 (b)). However, MetaCoAG has been able to recover these species with high F1-score values, e.g., improving  
101 the F1 score for *Pseudomonas putida* from 59.78% to 99.56% and improving the F1-score for *Arthrobacter arilaitensis* from  
102 97.65% to 98.99%. Despite the high variance in oligonucleotide composition and coverage, MetaCoAG has been able to  
103 recover these species accurately, thanks to the additional connectivity information from the assembly graph.

104 Another challenge faced by the majority of the existing binning tools is the inability to accurately separate contigs of  
105 species belonging to the same genus, where such species tend to have similar oligonucleotide composition and appear in similar  
106 abundances. For example, the following three species in simHC+, *Streptococcus pneumoniae*, *Streptococcus thermophilus* and  
107 *Streptococcus suis* are in the same genus *Streptococcus*, and they have very similar oligonucleotide composition (Refer to Fig. 4  
108 (a)) and similar coverages (*Streptococcus pneumoniae*: 56×, *Streptococcus thermophilus*: 60× and *Streptococcus suis*: 50×).  
109 Not surprisingly, contigs from these three species were incorrectly binned by MaxBin2 and even ignored by MetaBAT2 because  
110 they share similar composition and coverage profiles (Refer to Fig. 4 (b)). On the contrary, MetaCoAG was able to accurately  
111 bin most of the contigs from these three species because they naturally form three subgraphs in the assembly graph (Refer to  
112 Fig. 4 (b)), thus improving the F1-scores of *Streptococcus pneumoniae* from 46.51% to 93.40%, *Streptococcus thermophilus*  
113 from 49.97% to 95.67% and *Streptococcus suis* from 72.39% to 95.95%. Fig. 4 (b) demonstrates that the use of assembly graph  
114 in MetaCoAG can assist in the separation of species, despite the high similarity in oligonucleotide composition and coverage of  
115 certain species.

## 116 **Benchmarks using CAMI2 Toy Human Microbiome Project Datasets**

117 We benchmarked MetaCoAG against MaxBin2<sup>18</sup>, MetaBAT2<sup>29</sup>, and Vamb<sup>30</sup> on five publicly available datasets from the toy  
118 Human Microbiome Project dataset of the second Critical Assessment of Metagenomic Interpretation (CAMI)<sup>33</sup> challenge  
119 (Please refer to Supplementary Data 1 Table 1 for further details of the CAMI datasets). Multiple samples from each dataset  
120 were co-assembled together to obtain the final contigs for binning. Please refer to Supplementary Data 1 Fig. 5-7 for the  
121 multi-sample binning results, where we assembled the samples individually and binned them.

122 We evaluated the binning results of the CAMI datasets using CheckM<sup>32</sup> and reported the F1-score of the bins produced by  
123 all the binning tools. Fig. 5 (a)-(e) shows that overall MetaCoAG has achieved the best binning results among all the binning  
124 tools. The overall median F1-scores averaging from all 5 CAMI datasets for MetaCoAG, MaxBin2, MetaBAT2 and Vamb  
125 are 86.77%, 75.41%, 1.57% and 33.30%, respectively. More specifically, MetaCoAG has recovered more complete bins with  
126 higher purity when compared to other tools (Please refer to Supplementary Data 1 Fig. 3 and 4 for completeness and purity  
127 results). MetaCoAG produced the highest numbers of high-quality and medium-quality bins combined together for all the  
128 CAMI datasets (Refer to Supplementary Data 1 Table 6). Note that only MaxBin2 outperforms MetaCoAG in terms of the  
129 number of high-quality bins just for the GI dataset. This dataset had a low density in its assembly graph (Please refer to  
130 Supplementary Data 1 Table 1 for density of the assembly graph) which prevented MetaCoAG from making full use of the  
131 assembly graphs.

## 132 **Benchmarks using Sharon and COPD datasets**

133 We benchmarked MetaCoAG against MaxBin2<sup>18</sup>, MetaBAT2<sup>29</sup> and Vamb<sup>30</sup> on two real metagenomic datasets; **Sharon** dataset  
134 obtained from a pre-born infant's gut<sup>34</sup> and **COPD** dataset obtained from the Chronic Obstructive Pulmonary Disease (COPD)  
135 Lung Microbiome<sup>35</sup>. These datasets contain multiple samples (or runs) and further details about the samples used can be found  
136 in Supplementary Data 1 Table 3. The contigs and assembly graph for each dataset was obtained by co-assembling the reads  
137 from all the samples together. Please refer to Supplementary Data 1 Fig. 5-7 for the multi-sample binning results, where we  
138 assembled the samples individually and binned them.

139 Similar to the simHC+ and CAMI datasets, we again use CheckM<sup>32</sup> to evaluate the bins produced by all the binning tools  
140 and identify high-quality bins. Fig. 5 (f)-(g) shows that MetaCoAG has also achieved the best binning result in terms of the  
141 median F1-score for both the real datasets. For the Sharon dataset, MetaCoAG records a median F1-score of 99.24% while the

<sup>2</sup>MetaBAT2 was not included in this comparison as it had not recovered the species *Pseudomonas putida* and *Arthrobacter arilaitensis*.

second-best tool (Vamb) has a median F1-score of 83.88%. For the COPD dataset, MetaCoAG records a median F1-score of 75.68% while the second-best tool (MaxBin2) has a median F1-score of 25.13%. Furthermore, MetaCoAG has produced the highest number of high-quality bins and the lowest number of low-quality bins for both the real datasets (Please refer to Supplementary Data 1 Table 6 for the exact counts).

We used GTDB-Tk<sup>36</sup> to annotate all the high-quality bins produced by MetaCoAG, MaxBin2 and Vamb<sup>3</sup> for both datasets. Then we compared the taxonomic annotations (up to the species level) with the analysis results reported by the authors of these datasets (Refer to Table 1). Table 1 shows that MetaCoAG achieves the best consistency with the original analysis reported by the authors. In the Sharon dataset, the five most abundant species reported according to the authors<sup>34</sup>; *Staphylococcus epidermidis*, *Enterococcus faecalis*, *Cutibacterium avidum*, *Peptoniphilus lacydonensis* and *Staphylococcus aureus* have been successfully identified by all the three binning tools. However, Vamb missed *Staphylococcus hominis*, which is reported as a rare species in the Sharon dataset<sup>34</sup>. Moreover, MetaCoAG is the only tool that is able to recover *Leuconostoc citreum*, which is also identified as a rare species in the Sharon dataset<sup>34</sup>. These results denote the ability of MetaCoAG to recover rare species in real metagenomics samples that are ignored by other binning tools.

In the COPD dataset, there is a larger discrepancy among MaxBin2, Vamb and MetaCoAG. Only two species, *Peptostreptococcus sp.* and *SRI bacterium human oral taxon HOT-345*, have been identified by all the three binning tools. *SRI bacterium human oral taxon HOT-345* and *Lachnospiraceae bacterium oral taxon 096* have been added to NCBI taxonomy recently<sup>37</sup> and hence are not found in the original analysis<sup>35</sup>. Compared to MetaCoAG, MaxBin2 failed to identify three species *Prevotella pallens*, *Prevotella shahii* and *Prevotella histicola* while Vamb only identified *Prevotella pallens* under the genus *Prevotella*. Similarly, Vamb failed to identify two species, *Capnocytophaga gingivalis* and *Capnocytophaga leadbetteri*, both of which are identified by MaxBin2 and MetaCoAG. Moreover, the species *Anaeroglobus micronuciformis* only identified by MaxBin2 was not present in the top 50 genera ranked by abundance in the original analysis<sup>35</sup>, which is likely to be a false-positive. These results demonstrate that MetaCoAG has been able to recover more species correctly with respect to the original analysis of these real datasets.

## Discussion

Metagenomic sequencing and *de novo* assembly, coupled with binning methods have facilitated the characterization of different microbial communities. The majority of existing metagenomic contig-binning tools do not make use of the valuable connectivity information found in assembly graphs from which the contigs are derived. Furthermore, existing tools do not make use of multiple single-copy marker genes throughout the entire binning process.

MetaCoAG is a stand-alone tool for binning metagenomic contigs that makes use of composition, coverage and assembly graphs simultaneously. The use of connectivity information from the assembly graphs makes the binning process of MetaCoAG robust against high variance of intra-species oligonucleotide composition and coverage as well as similar inter-species oligonucleotide composition and coverage (within the same genus). Experimental results on both simulated and real datasets show that MetaCoAG achieves the best binning results compared to state-of-the-art tools, especially producing more high-quality bins and recovering more species.

MetaCoAG can be easily extended to work with other assemblers based on assembly graphs (e.g., the de Bruijn graph<sup>22</sup>, the string graph<sup>38</sup>, the repeat graph<sup>39</sup>, etc.) for both short and long reads. In the future, we plan to extend MetaCoAG to support overlapped binning<sup>25</sup>, *i.e.* detect contigs that may belong to multiple species. Furthermore, we plan to incorporate MetaCoAG with assembly pipelines that may lead to more efficient and accurate analysis for metagenomic datasets.

## Methods

### Step 0: Assemble Reads into Contigs and Construct the Assembly Graph

This preprocessing step is carried out to assemble the reads into contigs and obtain the assembly graph. Metagenomic assemblers first use graph models to connect overlapping reads or *k*-mers and to infer contigs as non-branching paths. After graph simplification, the vertices represent contigs and edges represent connections between contigs in the assembly graph. Here we use the popular metagenomic assembler metaSPAdes<sup>21</sup> to derive input contigs and assembly graphs. Note that the assembly graphs can also be obtained similarly using other metagenomic assemblers such as MEGAHIT<sup>20</sup> and metaFlye<sup>40</sup>.

### Step 1: Identify Contigs with Single-Copy Marker Genes

Single-copy marker genes appear only once in a bacterial genome and are conserved in the majority of bacterial genomes<sup>15–17</sup>. Similar to approaches such as MaxBin<sup>17</sup> and MaxBin2<sup>18</sup>, MetaCoAG uses 107 single-copy marker genes to distinguish contigs belonging to different species. For each of the 107 single-copy marker genes, we use FragGeneScan<sup>41</sup> and HMMER<sup>42</sup> to

<sup>3</sup>MetaBAT2 results were not considered for GTDB-Tk annotations as the results had very low number of high-quality bins compared to the other binning tools.

191 identify the contigs containing this single-copy marker gene. A single-copy marker gene is considered to be contained in a  
192 contig if at least 50% of the length of the gene is aligned to this contig.

## 193 Step 2: Order Single-copy Marker Genes and Estimate the Number of Initial Bins

194 For a given single-copy marker gene, the contigs containing this marker gene should come from different species (e.g., if two  
195 contigs contain the same marker gene, then the two contigs should belong to two different species). In the ideal case, if we have  
196 a near-perfect assembly, the number of contigs that contain the same single-copy marker gene should be equal to the number of  
197 species present in the sample. However, in reality, assemblies can be fragmented and erroneous, which may make it challenging  
198 to recover all single-copy marker genes and hence, lowering the counts of contigs containing each single-copy marker gene.

199 To get a better estimation of the number of species, we obtain the counts of contigs containing each single-copy marker  
200 gene. We also recorded the single-copy marker genes found in each contig. Now we order all the single-copy marker genes  
201 according to the descending order of the number of contigs containing them. For the single-copy marker genes having the  
202 same number of contigs, we order them according to the descending order of the total count of single-copy marker genes found  
203 in its constituent contigs. We refer to this list of ordered marker genes as *SMG* where a single-copy marker gene  $g_i$  has a set  
204 of contigs  $C(g_i)$  containing  $g_i$ . Then, the number of initial bins is set to be the largest count of contigs a marker gene has to  
205 recover the maximum number of species possible from the marker gene information.

## 206 Step 3: Bin Contigs with Single-copy Marker Genes

### 207 Step 3a: Initialize Bins

208 We initialize the bins using the contigs of the first single-copy marker gene  $g_1$  in *SMG*; i.e., we initialize a new bin  $B$  for each  
209 contig in  $C(g_1)$  (as shown in Step 3a of Fig. 1). We define the initialized set of bins as *BINS*. Please note that the number of  
210 bins  $|BINS|$  may change during the binning process.

### 211 Calculating Composition and Coverage Probabilities

212 Previous studies on metagenomics binning have used genomic signatures as they follow species-specific patterns<sup>17,43</sup>. The  
213 most commonly used genomic signatures to characterise composition information are *tetranucleotide frequencies* (strings of  
214 length  $k = 4$ , also known as *tetramers*). We obtain the normalized tetranucleotide frequency vectors of each contig  $c$  as  $tetra(c)$ .  
215 We obtain the tetranucleotide composition distance  $d_{tetra}(c, c')$  between two contigs  $c$  and  $c'$  as shown in equation 1 where  
216  $dist_E$  is the Euclidean distance function.

$$d_{tetra}(c, c') = dist_E(tetra(c), tetra(c')) \quad (1)$$

217 We follow the method used by Wu *et al.*<sup>17</sup> and define the probability function that  $c$  and  $c'$  belong to the same specie based  
218 on their composition,  $P_{comp}(c, c')$  as shown in equation 2.

$$P_{comp}(c, c') = \frac{N_{intra}(d_{tetra}(c, c') | \mu_{intra}, \sigma_{intra}^2)}{N_{intra}(d_{tetra}(c, c') | \mu_{intra}, \sigma_{intra}^2) + N_{inter}(d_{tetra}(c, c') | \mu_{inter}, \sigma_{inter}^2)} \quad (2)$$

219  $N_{intra}$  and  $N_{inter}$  are Gaussian distributions with  $\mu_{intra}$ ,  $\sigma_{intra}$ ,  $\mu_{inter}$  and  $\sigma_{inter}$  set according to the latest values of MaxBin  
220 2.2.7<sup>18</sup> which have been calculated by analysing the Euclidean distance between the tetranucleotide frequencies of pairs of  
221 sequences sampled from the same genome (*intra*) and different genomes (*inter*). If the distance is lower between two sequences,  
222 they are more probable to belong to the same genome.

223 We use the coverage information of the contigs as coverage carries important information about the abundance of species  
224 and has been used in previous metagenomics binning studies<sup>15,17</sup>. Shotgun sequencing has shown to follow the Lader-  
225 Waterman model<sup>44</sup> and the Poisson distribution has been used to obtain the sequencing coverage of nucleotides and applied in  
226 metagenomics binning<sup>17,45</sup>. Modifying the definition found in Wu *et al.*<sup>17</sup>, we define the probability function that  $c$  and  $c'$   
227 belongs to the same species given their coverage values in each sample,  $P_{cov}(c, c')$  as shown in equation 3.

$$P_{cov}(c, c') = \min \left( \prod_{n=1}^M Poisson(cov_n(c) | cov_n(c')), \prod_{n=1}^M Poisson(cov_n(c') | cov_n(c)) \right) \quad (3)$$

228 Here  $cov_n(c)$  and  $cov_n(c')$  refer to the coverage values of the contigs  $c$  and  $c'$  respectively in the sample  $n$  where  $M$  is the  
229 number of samples. *Poisson* is the Poisson probability mass function.

### 230 **Step 3b: Construct a Weighted Bipartite Graph and Find a Minimum-Weight Full Matching**

231 In the previous steps, we have used single-copy marker genes to identify pairs of contigs that belong to different species.  
 232 Remind that contigs in different bins in *BINS* are expected to belong to different species and contigs in  $C(g_i)$  are also expected  
 233 to belong to different species. However, there is no measurement to measure how likely a contig  $c$  in  $C(g_i)$  belongs to an  
 234 existing bin  $B$  in *BINS*. Therefore, we introduce a bipartite graph between  $C(g_i)$  and *BINS* and propose a weight  $w_{c2B}(c, B)$   
 235 between a contig  $c$  in  $C(g_i)$  and an existing bin  $B$  in *BINS* as shown in equation 4 (averaging over all the contigs in bin  $B$ ).

$$w_{c2B}(c, B) = \frac{\sum_{c' \in B} w_{c2c}(c, c')}{|B|} \quad (4)$$

236 In equation 4,  $w_{c2c}(c, c')$  is the weight that measures how likely a pair of contigs  $c$  and  $c'$  belong to the same species and is  
 237 computed using equation 5.

$$w_{c2c}(c, c') = -(\log(P_{comp}(c, c')) + \log(P_{cov}(c, c'))) \quad (5)$$

238 In equation 5,  $P_{comp}(c, c')$  and  $P_{cov}(c, c')$  are calculated according to equations 2 and 3 respectively.

239 Now we find a minimum-weight full matching (minimum-cost assignment)<sup>46</sup> for the above bipartite graph between  $C(g_i)$   
 240 and *BINS* where every contig  $c$  in  $C(g_i)$  will get paired with exactly one bin  $B$  in *BINS*. For this purpose, we use the minimum-  
 241 weight full matching algorithm implemented in the *NetworkX*<sup>4</sup> python library which is based on the algorithm proposed by  
 242 Karp<sup>46</sup> and the time complexity is  $O(|C(g_i)| \times |BINS| \times \log(|BINS|))$ .

243 In the next step, we will see how we can assign the contigs to existing bins based on the minimum-weight full matching we  
 244 have obtained.

### 245 **Step 3c: Assign Contigs to Existing Bins or Dynamically Adjust Bins**

246 Previous studies have observed that contigs connected to each other in the assembly graph are more likely to belong to the same  
 247 taxonomic group<sup>23,24</sup>. While  $w_{c2B}(c, B)$  considers both composition and coverage information, the assembly graph has not yet  
 248 been incorporated into the binning process. Therefore, we introduce  $d_{graph}(c, B)$  to measure how well contig  $c$  is connected  
 249 to contigs in bin  $B$  within the assembly graph. Specifically,  $d_{graph}(c, B)$  is defined as the average length of the shortest-path  
 250 distances between contig  $c$  and all the contigs in bin  $B$  in the assembly graph. Note that both  $w_{c2B}(c, B)$  and  $d_{graph}(c, B)$  will be  
 251 used to assign contigs to existing bins or dynamically adjust the bins.

252 We define the thresholds  $w_{intra}$  and  $w_{inter}$  as follows where  $M$  is the number of samples in the dataset.

$$w_{intra} = -(\log(p_{intra})) \times M \quad (6)$$

$$w_{inter} = -(\log(p_{inter})) \times M \quad (7)$$

253 Each candidate pair  $(c, B)$  obtained from the minimum-weight full matching falls under one of the following three cases as  
 254 shown in Supplementary Data 1 Fig. 1.

- 255 • **Case 1:** If the weight of the candidate pair  $w_{c2B}(c, B)$  is less than or equal to  $w_{intra}$  and the average distance  $d_{graph}(c, B)$   
 256 is less than or equal to  $d_{limit}$ , then contig  $c$  will be assigned to bin  $B$ , i.e.,  $B \leftarrow B \cup \{c\}$  (e.g., contig 4 and Bin 1 in  
 257 Supplementary Data 1 Fig. 1).
- 258 • **Case 2:** If the weight of the candidate pair  $w_{c2B}(c, B)$  is greater than  $w_{inter}$  and the average distance  $d_{graph}(c, B)$  is greater  
 259 than  $d_{limit}$ , then a new bin  $B'$  is created and contig  $c$  is assigned to that new bin, i.e.,  $B' = \{c\}$  and  $BINS \leftarrow BINS \cup \{B'\}$ .  
 260 (e.g., contig 21 in Supplementary Data 1 Fig. 1).
- 261 • **Case 3:** If  $w_{c2B}(c, B)$  and  $d_{graph}(c, B)$  satisfy neither Case 1 nor Case 2, then contig  $c$  will not be assigned to any bin  
 262 (e.g., contig 14 in Supplementary Data 1 Fig. 1).

263 The default values for parameters  $p_{intra}$ ,  $p_{inter}$ ,  $d_{limit}$  were chosen empirically and set to 0.1, 0.01 and 20 respectively. Now  
 264 we iteratively perform Steps 3b and 3c to process all the contigs containing single-copy marker genes. The remaining challenge  
 265 is to bin the contigs which do not contain single-copy marker genes which will be addressed in Step 4.

<sup>4</sup>[https://networkx.org/documentation/stable/reference/algorithms/generated/networkx.algorithms.bipartite.matching.minimum\\_weight\\_full\\_matching.html](https://networkx.org/documentation/stable/reference/algorithms/generated/networkx.algorithms.bipartite.matching.minimum_weight_full_matching.html)

#### 266 **Step 4: Bin Remaining Contigs Using Label Propagation**

267 After we bin the contigs with single-copy marker genes, each such contig receives a label corresponding to its bin. Now we will  
268 propagate labels from these contigs to other unlabeled contigs within the same connected component.

##### 269 **Step 4a: Propagate Labels Within Connected Components**

270 MetaCoAG uses composition, coverage and distance information from the assembly graph to propagate labels from labeled  
271 contigs to the unlabeled contigs located within the same connected components. More specifically, for each unlabeled  
272 long contig  $c$  (at least 1,000 bp long because short contigs result in unreliable composition and coverage information)  
273 directly connected or connected via short contigs to a labeled contig  $c'$ , MetaCoAG computes a candidate propagation action  
274  $(c', c, d(c, c'), w_{c2B}(c, B'))$  where  $d(c, c')$  is the shortest distance between  $c$  and  $c'$  using only unlabeled vertices and  $w_{c2B}(c, B')$   
275 is computed according to equation 4 where  $B'$  is the bin to which contig  $c'$  is assigned. Given two candidate propagation actions  
276  $(a, b, d, w)$  and  $(a', b', d', w')$ ,  $(a, b, d, w)$  has a higher priority than  $(a', b', d', w')$  if  $d < d'$  or  $(w < w'$  and  $d = d')$ . MetaCoAG  
277 iteratively selects the candidate propagation action with the highest priority and executes the corresponding label propagation. If  
278 a contig to be labeled contains single-copy marker genes, the relevant candidate propagation action is executed if the single-copy  
279 marker genes of the contig are not present in the intended bin. We restrict the depth of the search for labeled contigs in this step  
280 to 10 in order to speed up MetaCoAG.

##### 281 **Step 4b: Propagate Labels Across Different Components**

282 Note that some components in the assembly graph may not have any labeled contigs and we need to propagate labels from  
283 labeled bins to unlabeled contigs across components. Calculating pair-wise weights  $w_{c2c}(c, c')$  for all the remaining contigs  
284 becomes time consuming. Hence, for each bin  $B$  we create a representative contig  $c(B)$  which has a composition profile and  
285 a coverage profile calculated by averaging the normalized tetranucleotide frequency vectors and coverage vectors of all the  
286 contigs in bin  $B$ , respectively. These profiles will provide a better representation of the composition and coverage of the bins.  
287 Then, for each unlabeled contig  $c$ , MetaCoAG identifies a bin  $B$  that minimizes  $w_{c2c}(c, c(B))$  which is calculated according to  
288 equation 5, and assigns contig  $c$  into that bin  $B$ . This propagation is limited to long contigs (at least 1,000 bp long by default).  
289 If an unlabeled contig contains single-copy marker genes, it is assigned to bin  $B$  that minimizes  $w_{c2c}(c, c(B))$  if the single-copy  
290 marker genes of the contig are not present in bin  $B$ . Then, Step 4a is performed again to further propagate labels.

##### 291 **Step 4e: Postprocessing**

292 In this step, we will make final adjustment on the current bins. Two bins  $B$  and  $B'$  are *mergeable* if they have no common marker  
293 genes and  $w_{c2c}(c(B), c(B'))$  (calculated by equation 5) is upper bounded by  $w_{intra}$  (defined in Step 3c). Then, MetaCoAG  
294 creates a graph where vertices denote current bins and edges between two vertices denote that the corresponding two bins are  
295 mergeable. Now we use the implementation of python-igraph library to find maximal cliques ([https://igraph.org/c/doc/igraph-Cliques.html#igraph\\_maximal\\_cliques](https://igraph.org/c/doc/igraph-Cliques.html#igraph_maximal_cliques)) in this graph and merge the bins found in each maximal clique. After merging bins, we  
296 also remove the bins which contain less than one third (set by default) of the single-copy marker genes. Finally, MetaCoAG  
297 outputs the bins along with their corresponding contigs.  
298

## 299 **Datasets**

### 300 **Simulated Datasets**

301 We evaluated the binning performance on the simulated **simHC+** dataset<sup>17</sup> which consists of 100 bacterial species. Paired-end  
302 MiSeq reads were simulated using InSilicoSeq<sup>47</sup> with 300 bp mean read length.

### 303 **CAMI2 Toy Human Microbiome Project Datasets**

304 We used the simulated metagenome data from the toy Human Microbiome project of the second CAMI challenge<sup>33</sup>.  
305 Metagenomes were simulated from five different body sites of the human host as follows.

- 306 1. Urogenital tract - referred as **CAMI UG**
- 307 2. Skin - referred as **CAMI Skin**
- 308 3. Oral cavity - referred as **CAMI Oral**
- 309 4. Gastrointestinal tract - referred as **CAMI GI**
- 310 5. Airways - referred as **CAMI Airways**

## 311 **Real Datasets**

312 We used the following real datasets to evaluate the binning performance on real-world metagenomic data.

- 313 1. Pre-born infant gut metagenome,<sup>34</sup> - referred as **Sharon**
- 314 2. Metagenomics of the Chronic Obstructive Pulmonary Disease (COPD) Lung Microbiome<sup>35</sup> - referred as **COPD**

315 Please refer to Supplementary Data 1 Tables 1 and 3 for further details of all the datasets.

## 316 **Tools Used**

317 We used the popular metagenomic assembler metaSPAdes<sup>21</sup> (from SPAdes version 3.15.2<sup>48</sup>) to assemble reads into contigs  
318 and obtain the assembly graphs. The mean coverage of each contig in each sample was calculate using CoverM (available at  
319 <https://github.com/wwood/CoverM>).

320 MetaCoAG was benchmarked against the binning tools MaxBin2 (version 2.2.7)<sup>18</sup> in its default settings, MetaBAT2  
321 (version 2.12.1)<sup>29</sup> with `-m 1500` and Vamb (version 3.0.1)<sup>30</sup> in both co-assembly and multi-sample modes with the parameter  
322 `--minfasta 200000` as suggested by the authors. The commands used to run these tools can be found in Supplementary  
323 Data 1 Fig. 7.

324 The binning results were evaluated using the tools AMBER<sup>31</sup> (version 2.0.2), CheckM<sup>32</sup> (version 1.1.3) and GTDB-Tk<sup>36</sup>  
325 (version 1.5.0).

## 326 **Evaluation Criteria**

327 Since the ground truth species for the simHC+ dataset were available, we used Minimap2<sup>49</sup> to map the contigs to the reference  
328 genomes and determine the ground truth. With this ground truth annotation of contigs, we used AMBER<sup>31</sup> to assess the binning  
329 results of the simHC+ dataset. We set the recall as AMBER completeness and precision as AMBER purity and calculated the  
330 F1-score as  $2 \times (\text{precision} \times \text{recall}) / (\text{precision} + \text{recall})$  for each bin/species.

331 For all the datasets, we determined the completeness and contamination of the bins produced by each tool using CheckM<sup>32</sup>.  
332 We set the completeness as CheckM completeness and purity as  $1/(1 + \text{CheckM contamination})$ . To check the trade-off  
333 between completeness and purity, we set the recall as completeness and precision as purity, and calculated the F1-score as  $2$   
334  $\times (\text{precision} \times \text{recall}) / (\text{precision} + \text{recall})$  for each bin. Furthermore, we counted the number of high-quality bins (bins which have  
335  $>80\%$  recall and  $>90\%$  precision), medium-quality bins (bins which have  $>50\%$  recall and  $>80\%$  precision) and low-quality  
336 bins (bins which are not considered as high-quality or medium-quality).

337 To determine the species identified by the binning tools, we annotated all the high-quality bins of the real metagenomic  
338 datasets produced from the three best-performing tools; MetaCoAG, MaxBin2 and Vamb using GTDB-Tk<sup>36</sup> up to the species  
339 level. The species were determined by the classification string produced by GTDB-Tk.

## 340 **References**

- 341 1. Turnbaugh, P. J. *et al.* The Human Microbiome Project. *Nature* **449**, 804–810, DOI: [10.1038/nature06244](https://doi.org/10.1038/nature06244) (2007).
- 342 2. Sedlar, K., Kupkova, K. & Provaznik, I. Bioinformatics strategies for taxonomy independent binning and visualization of  
343 sequences in shotgun metagenomics. *Comput. Struct. Biotechnol. J.* **15**, 48–55, DOI: [https://doi.org/10.1016/j.csbj.2016.](https://doi.org/10.1016/j.csbj.2016.11.005)  
344 [11.005](https://doi.org/10.1016/j.csbj.2016.11.005) (2017).
- 345 3. Alanko, J., Cunial, F., Belazzougui, D. & Mäkinen, V. A framework for space-efficient read clustering in metagenomic  
346 samples. *BMC Bioinforma.* **18**, 59, DOI: [10.1186/s12859-017-1466-6](https://doi.org/10.1186/s12859-017-1466-6) (2017).
- 347 4. Girotto, S., Pizzi, C. & Comin, M. MetaProb: accurate metagenomic reads binning based on probabilistic sequence  
348 signatures. *Bioinformatics* **32**, i567–i575, DOI: [10.1093/bioinformatics/btw466](https://doi.org/10.1093/bioinformatics/btw466) (2016). [https://academic.oup.com/](https://academic.oup.com/bioinformatics/article-pdf/32/17/i567/24151444/btw466.pdf)  
349 [bioinformatics/article-pdf/32/17/i567/24151444/btw466.pdf](https://academic.oup.com/bioinformatics/article-pdf/32/17/i567/24151444/btw466.pdf).
- 350 5. Cleary, B. *et al.* Detection of low-abundance bacterial strains in metagenomic datasets by eigengenome partitioning. *Nat.*  
351 *Biotechnol.* **33**, 1053 (2015).
- 352 6. Luo, Y., Yu, Y. W., Zeng, J., Berger, B. & Peng, J. Metagenomic binning through low-density hashing. *Bioinformatics*  
353 **35**, 219–226, DOI: [10.1093/bioinformatics/bty611](https://doi.org/10.1093/bioinformatics/bty611) (2018). [http://oup.prod.sis.lan/bioinformatics/article-pdf/35/2/219/](http://oup.prod.sis.lan/bioinformatics/article-pdf/35/2/219/27497122/bty611.pdf)  
354 [27497122/bty611.pdf](http://oup.prod.sis.lan/bioinformatics/article-pdf/35/2/219/27497122/bty611.pdf).
- 355 7. Ounit, R., Wanamaker, S., Close, T. J. & Lonardi, S. CLARK: fast and accurate classification of metagenomic and genomic  
356 sequences using discriminative k-mers. *BMC Genomics* **16**, 236, DOI: [10.1186/s12864-015-1419-2](https://doi.org/10.1186/s12864-015-1419-2) (2015).



- 357 **8.** Schaeffer, L., Pimentel, H., Bray, N., Melsted, P. & Pachter, L. Pseudoalignment for metagenomic read assignment. *Bioinformatics* **33**, 2082–2088, DOI: [10.1093/bioinformatics/btx106](https://doi.org/10.1093/bioinformatics/btx106) (2017). <http://oup.prod.sis.lan/bioinformatics/article-pdf/33/14/2082/25156929/btx106.pdf>.
- 358
- 359
- 360 **9.** Vinh, L. V., Lang, T. V., Binh, L. T. & Hoai, T. V. A two-phase binning algorithm using l-mer frequency on groups of  
361 non-overlapping reads. *Algorithms for Mol. Biol.* **10**, 2, DOI: [10.1186/s13015-014-0030-4](https://doi.org/10.1186/s13015-014-0030-4) (2015).
- 362 **10.** Yu, G., Jiang, Y., Wang, J., Zhang, H. & Luo, H. BMC3C: binning metagenomic contigs using codon usage, sequence  
363 composition and read coverage. *Bioinformatics* **34**, 4172–4179, DOI: [10.1093/bioinformatics/bty519](https://doi.org/10.1093/bioinformatics/bty519) (2018). <https://academic.oup.com/bioinformatics/article-pdf/34/24/4172/27088792/bty519.pdf>.
- 364
- 365 **11.** Yue, Y. *et al.* Evaluating metagenomics tools for genome binning with real metagenomic datasets and CAMI datasets.  
366 *BMC Bioinforma.* **21**, 334, DOI: [10.1186/s12859-020-03667-3](https://doi.org/10.1186/s12859-020-03667-3) (2020).
- 367 **12.** Wood, D. E. & Salzberg, S. L. Kraken: ultrafast metagenomic sequence classification using exact alignments. *Genome*  
368 *Biol.* **15**, R46 (2014).
- 369 **13.** Kim, D., Song, L., Breitwieser, F. P. & Salzberg, S. L. Centrifuge: rapid and sensitive classification of metagenomic  
370 sequences. *Genome Res.* **26**, 1721–1729 (2016). <http://genome.cshlp.org/content/26/12/1721.full.pdf+html>.
- 371 **14.** Menzel, P., Ng, K. L. & Krogh, A. Fast and sensitive taxonomic classification for metagenomics with Kaiju. *Nat. Commun.*  
372 **7**, 11257 (2016). Article.
- 373 **15.** Albertsen, M. *et al.* Genome sequences of rare, uncultured bacteria obtained by differential coverage binning of multiple  
374 metagenomes. *Nat. Biotechnol.* **31**, 533–538, DOI: [10.1038/nbt.2579](https://doi.org/10.1038/nbt.2579) (2013).
- 375 **16.** Dupont, C. L. *et al.* Genomic insights to SAR86, an abundant and uncultivated marine bacterial lineage. *The ISME journal*  
376 **6**, 1186–1199 (2012).
- 377 **17.** Wu, Y.-W., Tang, Y.-H., Tringe, S. G., Simmons, B. A. & Singer, S. W. MaxBin: an automated binning method to  
378 recover individual genomes from metagenomes using an expectation-maximization algorithm. *Microbiome* **2**, 26, DOI:  
379 [10.1186/2049-2618-2-26](https://doi.org/10.1186/2049-2618-2-26) (2014).
- 380 **18.** Wu, Y.-W., Simmons, B. A. & Singer, S. W. MaxBin 2.0: an automated binning algorithm to recover genomes from  
381 multiple metagenomic datasets. *Bioinformatics* **32**, 605–607, DOI: [10.1093/bioinformatics/btv638](https://doi.org/10.1093/bioinformatics/btv638) (2015).
- 382 **19.** Peng, Y., Leung, H. C. M., Yiu, S. M. & Chin, F. Y. L. IDBA-UD: a de novo assembler for single-cell and metagenomic  
383 sequencing data with highly uneven depth. *Bioinformatics* **28**, 1420–1428, DOI: [10.1093/bioinformatics/bts174](https://doi.org/10.1093/bioinformatics/bts174) (2012).  
384 <https://academic.oup.com/bioinformatics/article-pdf/28/11/1420/742285/bts174.pdf>.
- 385 **20.** Li, D., Liu, C.-M., Luo, R., Sadakane, K. & Lam, T.-W. MEGAHIT: an ultra-fast single-node solution for large and complex  
386 metagenomics assembly via succinct de Bruijn graph. *Bioinformatics* **31**, 1674–1676, DOI: [10.1093/bioinformatics/btv033](https://doi.org/10.1093/bioinformatics/btv033)  
387 (2015). <https://academic.oup.com/bioinformatics/article-pdf/31/10/1674/17085710/btv033.pdf>.
- 388 **21.** Nurk, S., Meleshko, D., Korobeynikov, A. & Pevzner, P. A. metaSPAdes: a new versatile metagenomic assembler. *Genome*  
389 *Res.* **27**, 824–834, DOI: [10.1101/gr.213959.116](https://doi.org/10.1101/gr.213959.116) (2017). <http://genome.cshlp.org/content/27/5/824.full.pdf+html>.
- 390 **22.** Pevzner, P. A., Tang, H. & Waterman, M. S. An Eulerian path approach to DNA fragment assembly. *Proc. Natl. Acad. Sci.*  
391 **98**, 9748–9753, DOI: [10.1073/pnas.171285098](https://doi.org/10.1073/pnas.171285098) (2001). <https://www.pnas.org/content/98/17/9748.full.pdf>.
- 392 **23.** Barnum, T. P. *et al.* Genome-resolved metagenomics identifies genetic mobility, metabolic interactions, and unexpected  
393 diversity in perchlorate-reducing communities. *The ISME J.* **12**, 1568–1581, DOI: [10.1038/s41396-018-0081-5](https://doi.org/10.1038/s41396-018-0081-5) (2018).
- 394 **24.** Mallawaarachchi, V., Wickramarachchi, A. & Lin, Y. GraphBin: Refined binning of metagenomic contigs using assembly  
395 graphs. *Bioinformatics* **36**, 3307–3313, DOI: [10.1093/bioinformatics/btaa180](https://doi.org/10.1093/bioinformatics/btaa180) (2020). <https://academic.oup.com/bioinformatics/advance-article-pdf/doi/10.1093/bioinformatics/btaa180/32903382/btaa180.pdf>.
- 396
- 397 **25.** Mallawaarachchi, V. G., Wickramarachchi, A. S. & Lin, Y. GraphBin2: Refined and Overlapped Binning of Metagenomic  
398 Contigs Using Assembly Graphs. In Kingsford, C. & Pisanti, N. (eds.) *20th International Workshop on Algorithms*  
399 *in Bioinformatics (WABI 2020)*, vol. 172 of *Leibniz International Proceedings in Informatics (LIPIcs)*, 8:1–8:21, DOI:  
400 [10.4230/LIPIcs.WABI.2020.8](https://doi.org/10.4230/LIPIcs.WABI.2020.8) (Schloss Dagstuhl–Leibniz-Zentrum für Informatik, Dagstuhl, Germany, 2020).
- 401 **26.** Zhang, Z. & Zhang, L. METAMVGL: a multi-view graph-based metagenomic contig binning algorithm by integrating  
402 assembly and paired-end graphs. *bioRxiv* DOI: [10.1101/2020.10.18.344697](https://doi.org/10.1101/2020.10.18.344697) (2020). <https://www.biorxiv.org/content/early/2020/10/19/2020.10.18.344697.full.pdf>.
- 403
- 404 **27.** Quince, C. *et al.* STRONG: metagenomics strain resolution on assembly graphs. *Genome Biol.* **22**, 214, DOI: [10.1186/s13059-021-02419-7](https://doi.org/10.1186/s13059-021-02419-7) (2021).
- 405

- 406 **28.** Wang, Z., Wang, Z., Lu, Y. Y., Sun, F. & Zhu, S. SolidBin: improving metagenome binning with semi-supervised  
407 normalized cut. *Bioinformatics* **35**, 4229–4238, DOI: [10.1093/bioinformatics/btz253](https://doi.org/10.1093/bioinformatics/btz253) (2019). [https://academic.oup.com/  
408 bioinformatics/article-pdf/35/21/4229/30330800/btz253.pdf](https://academic.oup.com/bioinformatics/article-pdf/35/21/4229/30330800/btz253.pdf).
- 409 **29.** Kang, D. *et al.* MetaBAT 2: an adaptive binning algorithm for robust and efficient genome reconstruction from metagenome  
410 assemblies. *PeerJ* **7**, e27522v1, DOI: [10.7287/peerj.preprints.27522v1](https://doi.org/10.7287/peerj.preprints.27522v1) (2019).
- 411 **30.** Nissen, J. N. *et al.* Improved metagenome binning and assembly using deep variational autoencoders. *Nat. Biotechnol.*  
412 DOI: [10.1038/s41587-020-00777-4](https://doi.org/10.1038/s41587-020-00777-4) (2021).
- 413 **31.** Meyer, F. *et al.* AMBER: Assessment of Metagenome BinnERs. *GigaScience* **7**, DOI: [10.1093/gigascience/gyi069](https://doi.org/10.1093/gigascience/gyi069)  
414 (2018). Gyi069, [https://academic.oup.com/gigascience/article-pdf/7/6/gyi069/25099083/gyi069\\_response\\_to\\_reviewer\\_  
415 comments\\_revision\\_1.pdf](https://academic.oup.com/gigascience/article-pdf/7/6/gyi069/25099083/gyi069_response_to_reviewer_comments_revision_1.pdf).
- 416 **32.** Parks, D. H., Imelfort, M., Skennerton, C. T., Hugenholtz, P. & Tyson, G. W. Checkm: assessing the quality of microbial  
417 genomes recovered from isolates, single cells, and metagenomes. *Genome Res.* **25**, 1043–1055, DOI: [10.1101/gr.186072.  
418 114](https://doi.org/10.1101/gr.186072.114) (2015). <http://genome.cshlp.org/content/25/7/1043.full.pdf+html>.
- 419 **33.** Sczyrba, A. *et al.* Critical Assessment of Metagenome Interpretation—a benchmark of metagenomics software. *Nat.*  
420 *Methods* **14**, 1063–1071 (2017).
- 421 **34.** Sharon, I. *et al.* Time series community genomics analysis reveals rapid shifts in bacterial species, strains, and phage  
422 during infant gut colonization. *Genome Res.* **23**, 111–120, DOI: [10.1101/gr.142315.112](https://doi.org/10.1101/gr.142315.112) (2013). [http://genome.cshlp.org/  
423 content/23/1/111.full.pdf+html](http://genome.cshlp.org/content/23/1/111.full.pdf+html).
- 424 **35.** Cameron, S. J. S. *et al.* Metagenomic sequencing of the chronic obstructive pulmonary disease upper bronchial tract  
425 microbiome reveals functional changes associated with disease severity. *PLOS ONE* **11**, 1–16, DOI: [10.1371/journal.pone.  
426 0149095](https://doi.org/10.1371/journal.pone.0149095) (2016).
- 427 **36.** Chaumeil, P.-A., Mussig, A. J., Hugenholtz, P. & Parks, D. H. GTDB-Tk: a toolkit to classify genomes with the  
428 Genome Taxonomy Database. *Bioinformatics* **36**, 1925–1927, DOI: [10.1093/bioinformatics/btz848](https://doi.org/10.1093/bioinformatics/btz848) (2019). <https://academic.oup.com/bioinformatics/article-pdf/36/6/1925/32915144/btz848.pdf>.
- 429 **37.** Schoch, C. L. *et al.* NCBI Taxonomy: a comprehensive update on curation, resources and tools. *Database* **2020** (2020).
- 430 **38.** Myers, E. W. The fragment assembly string graph. *Bioinformatics* **21**, ii79–ii85, DOI: [10.1093/bioinformatics/bti1114](https://doi.org/10.1093/bioinformatics/bti1114)  
431 (2005). [http://oup.prod.sis.lan/bioinformatics/article-pdf/21/suppl\\_2/ii79/6686032/bti1114.pdf](http://oup.prod.sis.lan/bioinformatics/article-pdf/21/suppl_2/ii79/6686032/bti1114.pdf).
- 432 **39.** Kolmogorov, M., Yuan, J., Lin, Y. & Pevzner, P. A. Assembly of long, error-prone reads using repeat graphs. *Nat.*  
433 *biotechnology* **37**, 540–546 (2019).
- 434 **40.** Kolmogorov, M. *et al.* metaFlye: scalable long-read metagenome assembly using repeat graphs. *Nat. Methods* **17**,  
435 1103–1110, DOI: [10.1038/s41592-020-00971-x](https://doi.org/10.1038/s41592-020-00971-x) (2020).
- 436 **41.** Rho, M., Tang, H. & Ye, Y. FragGeneScan: predicting genes in short and error-prone reads. *Nucleic Acids Res.* **38**,  
437 e191–e191, DOI: [10.1093/nar/gkq747](https://doi.org/10.1093/nar/gkq747) (2010). <https://academic.oup.com/nar/article-pdf/38/20/e191/16772703/gkq747.pdf>.
- 438 **42.** Eddy, S. R. Accelerated profile hmm searches. *PLOS Comput. Biol.* **7**, 1–16, DOI: [10.1371/journal.pcbi.1002195](https://doi.org/10.1371/journal.pcbi.1002195) (2011).
- 439 **43.** Deschavanne, P. J., Giron, A., Vilain, J., Fagot, G. & Fertil, B. Genomic signature: characterization and classification of  
440 species assessed by chaos game representation of sequences. *Mol. Biol. Evol.* **16**, 1391–1399, DOI: [10.1093/oxfordjournals.  
441 molbev.a026048](https://doi.org/10.1093/oxfordjournals.molbev.a026048) (1999). <https://academic.oup.com/mbe/article-pdf/16/10/1391/9592103/mbe1391.pdf>.
- 442 **44.** Lander, E. S. & Waterman, M. S. Genomic mapping by fingerprinting random clones: A mathematical analysis. *Genomics*  
443 **2**, 231 – 239, DOI: [https://doi.org/10.1016/0888-7543\(88\)90007-9](https://doi.org/10.1016/0888-7543(88)90007-9) (1988).
- 444 **45.** Wu, Y.-W. & Ye, Y. A novel abundance-based algorithm for binning metagenomic sequences using l-tuples. *J. Comput.*  
445 *Biol.* **18**, 523–534, DOI: [10.1089/cmb.2010.0245](https://doi.org/10.1089/cmb.2010.0245) (2011). PMID: 21385052, <https://doi.org/10.1089/cmb.2010.0245>.
- 446 **46.** Karp, R. M. An algorithm to solve the  $m \times n$  assignment problem in expected time  $o(mn \log n)$ . *Networks* **10**, 143–152,  
447 DOI: [10.1002/net.3230100205](https://doi.org/10.1002/net.3230100205) (1980). <https://onlinelibrary.wiley.com/doi/pdf/10.1002/net.3230100205>.
- 448 **47.** Gourel, H., Karlsson-Lindsjö, O., Hayer, J. & Bongcam-Rudloff, E. Simulating Illumina metagenomic data with InSilicoSeq.  
449 *Bioinformatics* **35**, 521–522, DOI: [10.1093/bioinformatics/bty630](https://doi.org/10.1093/bioinformatics/bty630) (2018). [http://oup.prod.sis.lan/bioinformatics/article-pdf/  
450 35/3/521/27699758/bty630.pdf](http://oup.prod.sis.lan/bioinformatics/article-pdf/35/3/521/27699758/bty630.pdf).
- 451 **48.** Bankevich, A. *et al.* SPAdes: A New Genome Assembly Algorithm and Its Applications to Single-Cell Sequencing. *J.*  
452 *Comput. Biol.* **19**, 455–477, DOI: [10.1089/cmb.2012.0021](https://doi.org/10.1089/cmb.2012.0021) (2012). PMID: 22506599, [https://doi.org/10.1089/cmb.2012.  
453 0021](https://doi.org/10.1089/cmb.2012.0021).
- 454

455 **49.** Li, H. Minimap2: pairwise alignment for nucleotide sequences. *Bioinformatics* **34**, 3094–3100, DOI: [10.1093/](https://doi.org/10.1093/bioinformatics/bty191)  
456 [bioinformatics/bty191](https://doi.org/10.1093/bioinformatics/bty191) (2018). [https://academic.oup.com/bioinformatics/article-pdf/34/18/3094/25731860/bty191\\_suppl\\_](https://academic.oup.com/bioinformatics/article-pdf/34/18/3094/25731860/bty191_suppl_data.pdf)  
457 [data.pdf](https://academic.oup.com/bioinformatics/article-pdf/34/18/3094/25731860/bty191_suppl_data.pdf).

## 458 **Data availability**

459 All the CAMI and real datasets containing raw sequencing data used for this study are publicly available from their respective  
460 studies. The CAMI2 Toy Human Microbiome Project datasets were downloaded from <https://data.cami-challenge.org/participate>  
461 from the 2nd CAMI Toy Human Microbiome Project Dataset. The Sharon dataset was downloaded from NCBI with BioProject  
462 number PRJNA60717 and accession number SRA052203. The COPD dataset was downloaded from NCBI with BioProject  
463 number PRJEB9034. NCBI accession numbers of the runs used to assemble the Sharon and COPD datasets can be found in  
464 Supplementary Data 1 Table 3. All the assembled data and results from all the binning tools, including the source data for  
465 Figs. 2-5 and Table 1 are available on figshare at <https://figshare.com/projects/MetaCoAG/121014>.

## 466 **Code availability**

467 The code of MetaCoAG can be found on GitHub at <https://github.com/Vini2/MetaCoAG> and is freely available under the  
468 GPL-3.0 license. All analyses in this paper were performed using MetaCoAG v.1.0 with default parameters.

## 469 **Acknowledgements**

470 This research was undertaken with the assistance of resources and services from the National Computational Infrastructure  
471 (NCI), which is supported by the Australian Government.

## 472 **Author contributions**

473 V.M. and Y.L. designed the algorithm and drafted the manuscript. V.M. implemented MetaCoAG and conducted the experiments.  
474 V.M. and Y.L. analyzed the results. Y.L. supervised the project. All authors reviewed the manuscript.

## 475 **Competing interests**

476 The authors declare that they have no competing interests.

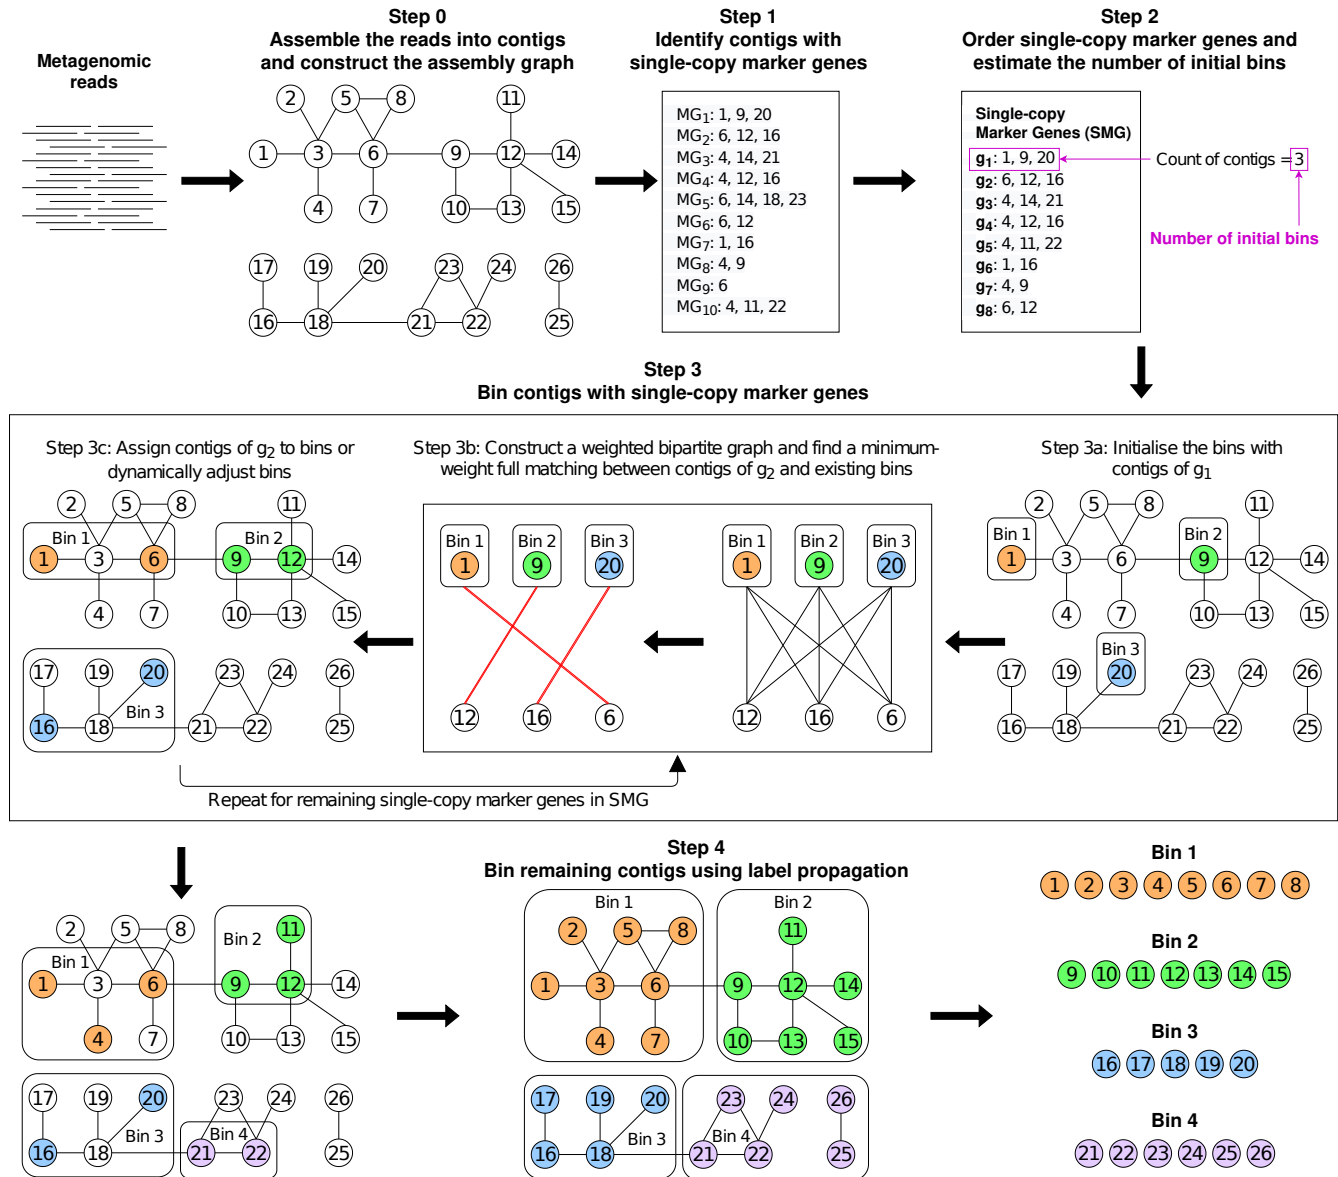

**Figure 1. MetaCoAG Workflow.** The assembly graph with contigs are provided as inputs to MetaCoAG. MetaCoAG first identifies a list of contigs that contain each single-copy marker gene. MetaCoAG further counts the number of contigs containing each single-copy marker gene and estimates the initial number of bins. Next, MetaCoAG applies a graph-matching algorithm to assign contigs that contain single-copy marker genes into bins iteratively and adjust the number of bins dynamically. Then, MetaCoAG bins the remaining contigs using label propagation algorithms based on the assembly graph and performs a postprocessing step. Finally, MetaCoAG outputs the bins along with their corresponding contigs.

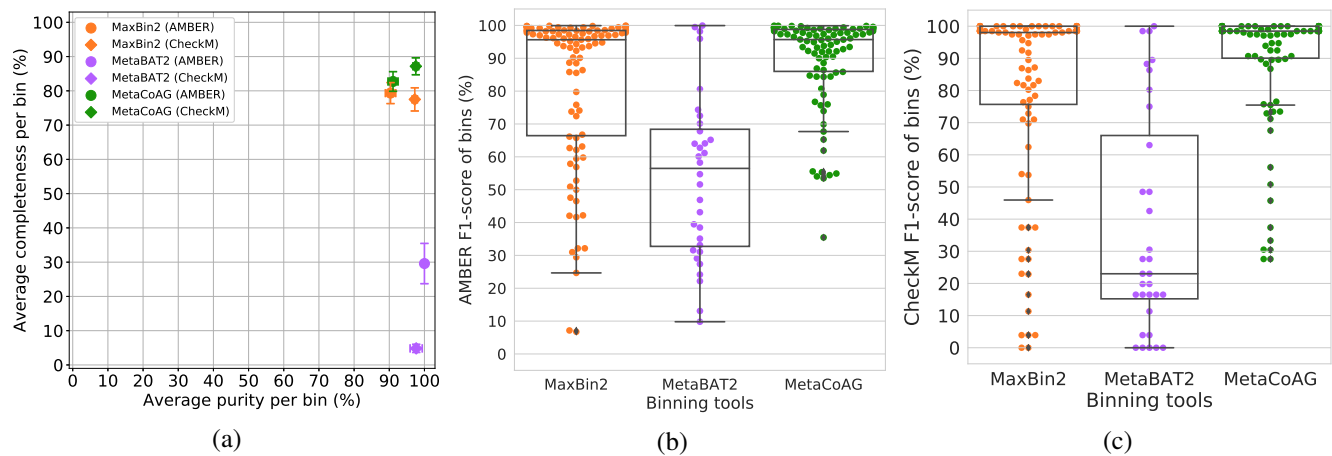

**Figure 2. AMBER and CheckM results of the bins of the simHC+ dataset.** (a) Quality of bins in terms of average completeness per bin vs. average purity per bin obtained from AMBER and CheckM. (b) F1-score of the bins obtained from AMBER. (c) F1-score of the bins obtained from CheckM.

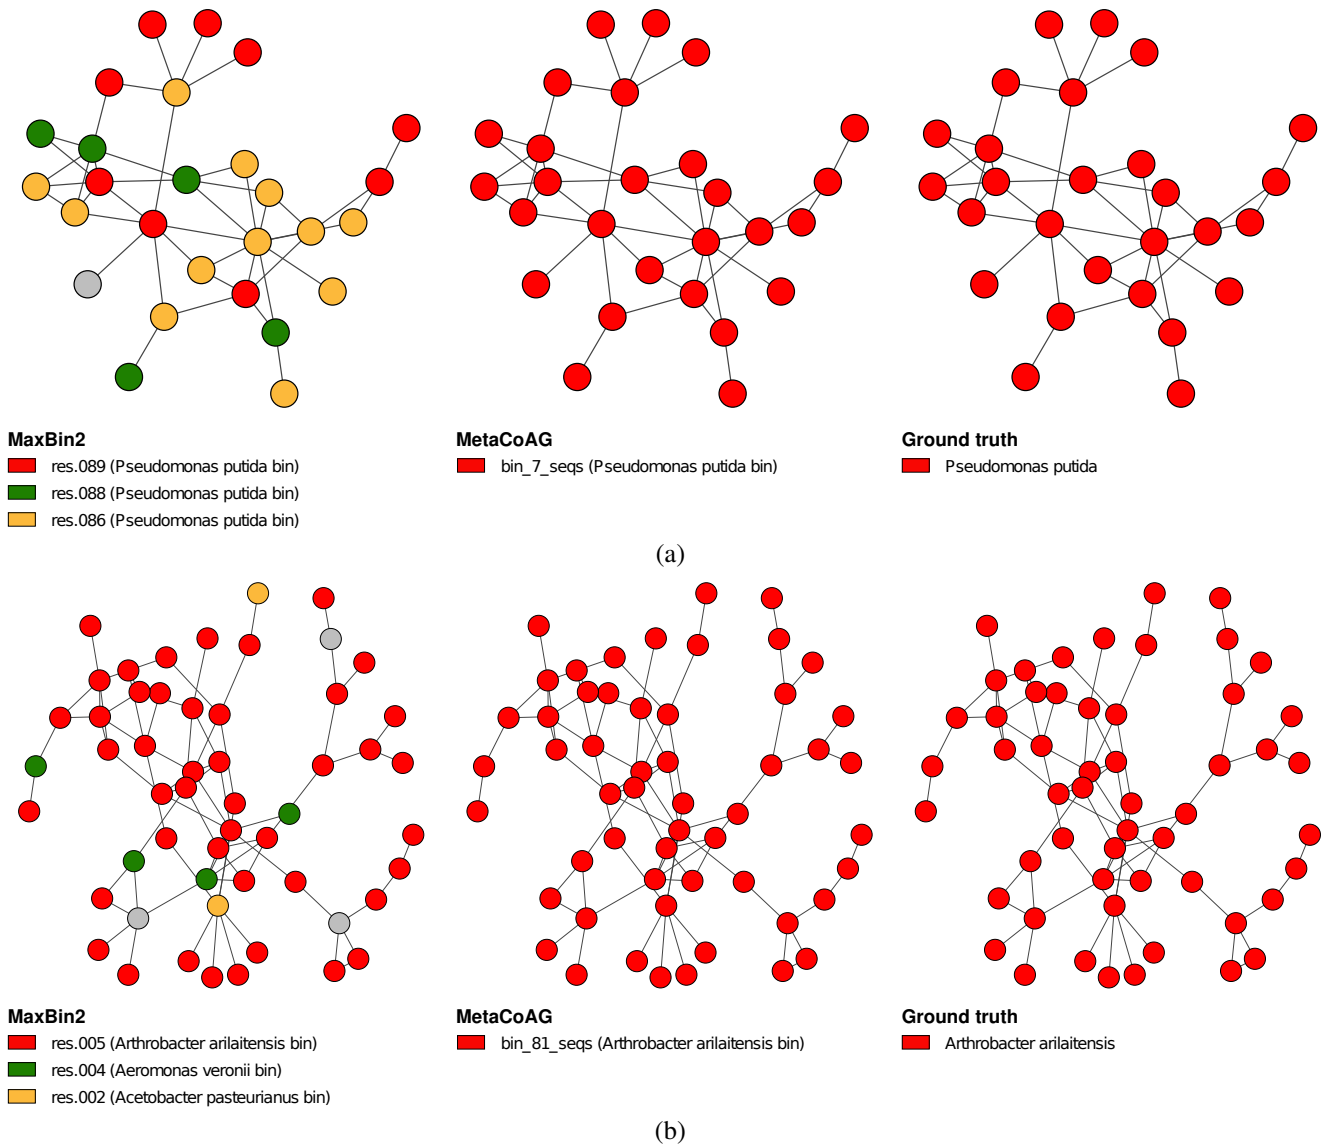

**Figure 3. Visualization of the binning results of the simHC+ dataset for species with high variance in oligonucleotide composition and high variance in coverage.** Visualization of the binning results from MaxBin2 and MetaCoAG for a species with (a) high variance in oligonucleotide composition (standard deviation  $> 0.015$ ) and (b) high variance in coverage (standard deviation  $> 50\times$ ). Gray color nodes denote contigs which were binned to bins other than the ones specified in the figure.

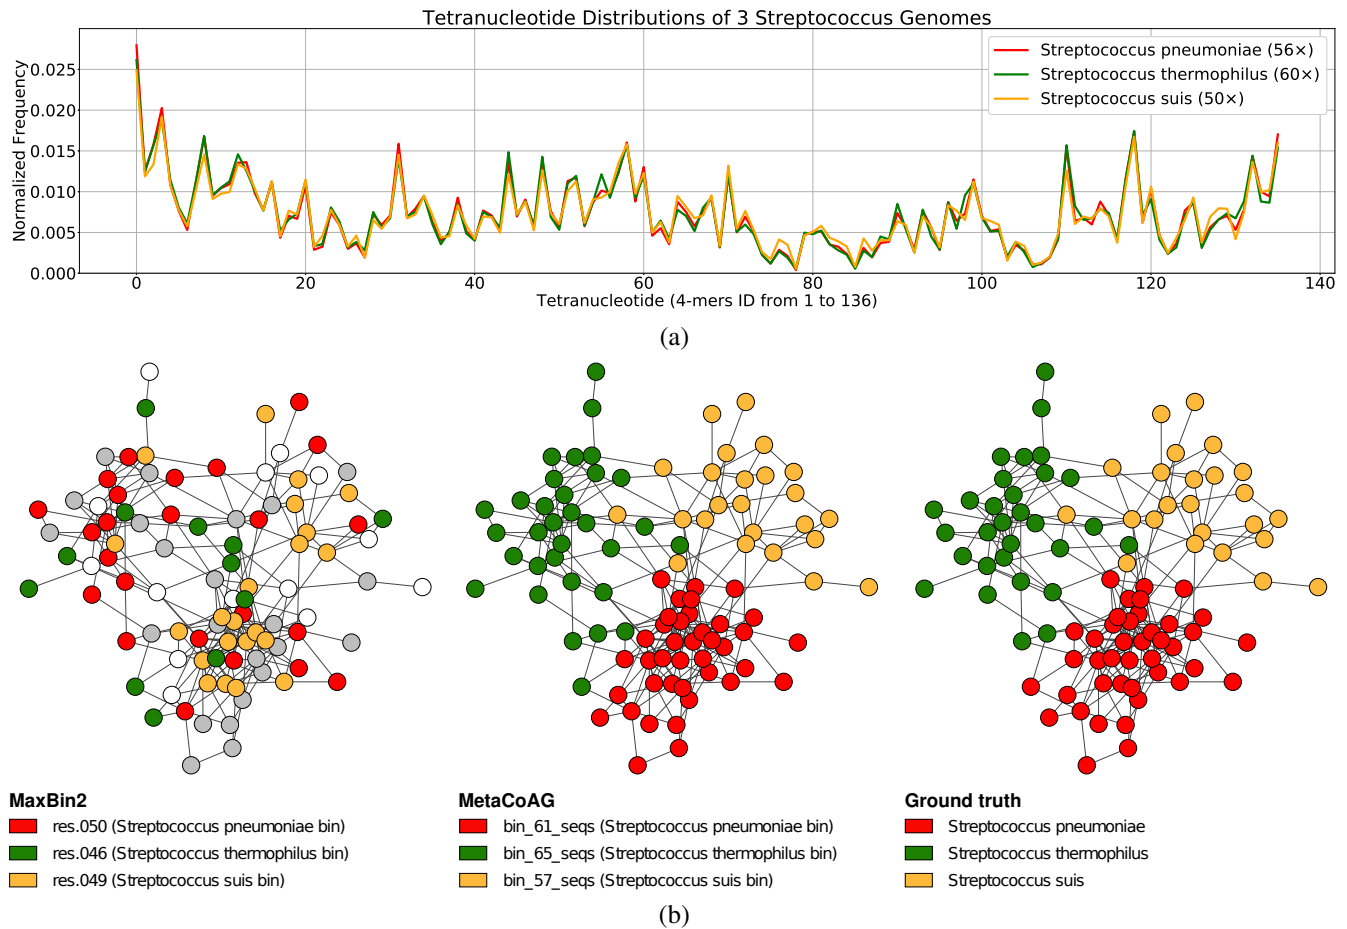

**Figure 4. Visualization of the tetranucleotide composition and binning results of three *Streptococcus* genomes in the simHC+ dataset.** (a) Tetranucleotide distributions of the three *Streptococcus* genomes; *Streptococcus pneumoniae* (red) with 56× coverage, *Streptococcus suis* (yellow) with 60× coverage and *Streptococcus thermophilus* (green) with 50× coverage. (b) Visualization of the binning results from MaxBin2 and MetaCoAG for three *Streptococcus* genomes. White color nodes denote discarded contigs and gray color nodes denote contigs which were binned to bins other than the three *Streptococcus* genomes. MetaBAT2 was not included as it had not recovered these three species.

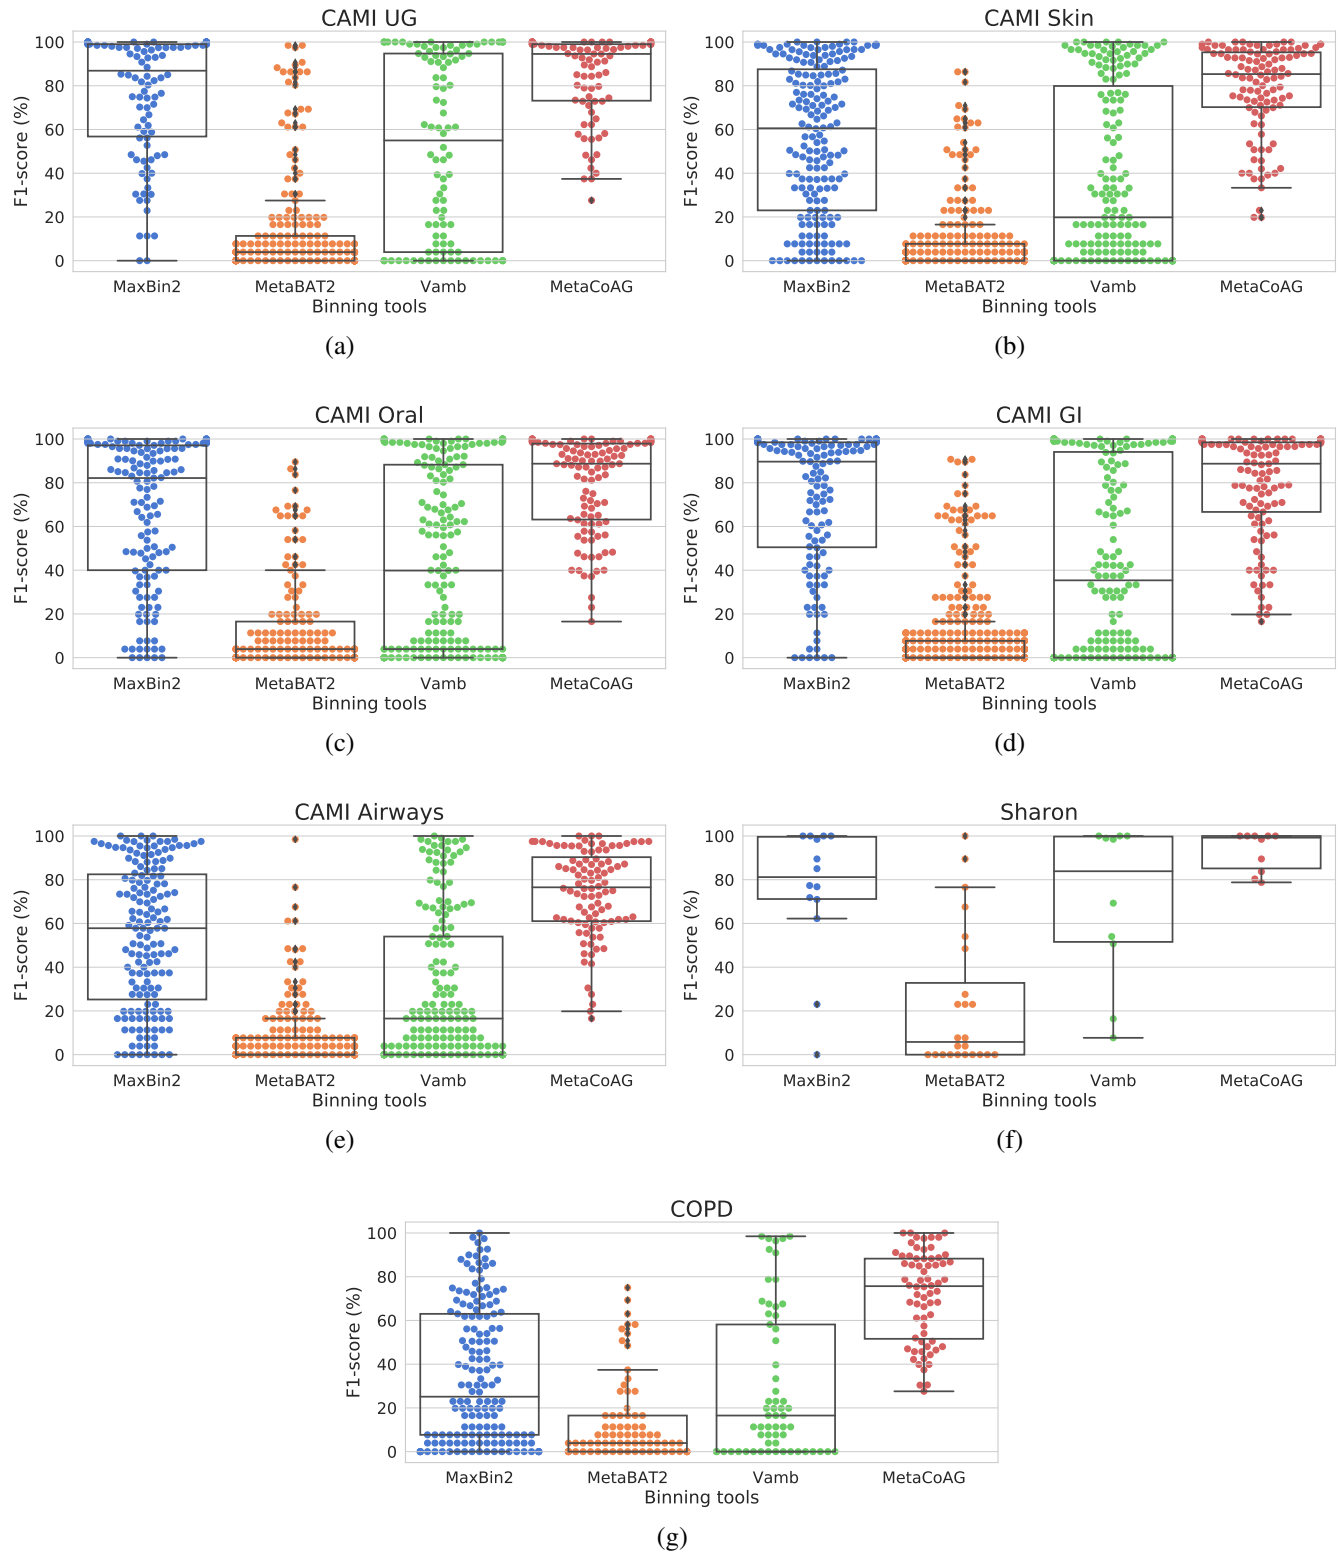

**Figure 5. F1-score of the CAMI and real datasets.** The F1-scores of the bins found in the CAMI and real datasets by all the binning tools in co-assembly mode.



| Dataset                                  | Species                                | MaxBin2 <sup>18</sup> | Vamb <sup>30</sup> | MetaCoAG       | Present in original analysis |
|------------------------------------------|----------------------------------------|-----------------------|--------------------|----------------|------------------------------|
| Sharon <sup>34</sup>                     | Cutibacterium avidum                   | ✓                     | ✓                  | ✓              | ✓                            |
|                                          | Enterococcus faecalis                  | ✓                     | ✓                  | ✓              | ✓                            |
|                                          | Peptoniphilus lacydonensis             | ✓                     | ✓                  | ✓              | ✓                            |
|                                          | Staphylococcus aureus                  | ✓                     | ✓                  | ✓              | ✓                            |
|                                          | Staphylococcus epidermidis             | ✓                     | ✓                  | ✓              | ✓                            |
|                                          | Staphylococcus hominis                 | ✓                     | ✗                  | ✓              | ✓                            |
|                                          | Leuconostoc citreum                    | ✗                     | ✗                  | ✓              | ✓                            |
| COPD <sup>35*</sup>                      | Peptostreptococcus sp.                 | ✓                     | ✓                  | ✓              | ✓                            |
|                                          | SR1 bacterium human oral taxon HOT-345 | ✓                     | ✓                  | ✓              | ✗ <sup>†</sup>               |
|                                          | Prevotella pallens                     | ✗                     | ✓                  | ✓              | ✓                            |
|                                          | Haemophilus sputorum                   | ✗                     | ✓                  | ✓              | ✓                            |
|                                          | Herbaspirillum huttiense               | ✗                     | ✓                  | ✓              | ✓                            |
|                                          | Capnocytophaga gingivalis              | ✓                     | ✗                  | ✓              | ✓                            |
|                                          | Capnocytophaga leadbetteri             | ✓                     | ✗                  | ✓              | ✓                            |
|                                          | Lancefieldella sp000564995             | ✓                     | ✗                  | ✓              | ✓                            |
|                                          | Actinomyces graevenitzii               | ✓                     | ✗                  | ✗              | ✓                            |
|                                          | Actinomyces oris                       | ✓                     | ✗                  | ✗              | ✓                            |
|                                          | Anaeroglobus micronuciformis           | ✓                     | ✗                  | ✗              | ✗                            |
|                                          | Eubacterium sulci                      | ✗                     | ✗                  | ✓              | ✓                            |
|                                          | Prevotella shahii                      | ✗                     | ✗                  | ✓              | ✓                            |
|                                          | Prevotella histicola                   | ✗                     | ✗                  | ✓              | ✓                            |
| Lachnospiraceae bacterium oral taxon 096 | ✗                                      | ✗                     | ✓                  | ✗ <sup>†</sup> |                              |

**Table 1. High-quality species found from the GTDB-Tk annotations of MetaCoAG, MaxBin2 and Vamb for the real metagenomic datasets.** We annotated all the high-quality bins of the real metagenomic datasets produced from MetaCoAG, MaxBin2 and Vamb using GTDB-Tk up to the species level. Then we determined whether these taxonomic groups are actually present in the original analysis. The species were determined by the classification string produced by GTDB-Tk up to species level. ✓ denotes that the species is present and ✗ denotes that the species is absent in the result/analysis. Green colored items match the original analysis whereas the red colored items do not match the original analysis.

\*For the COPD dataset, the species were determined as present in the original analysis based on the 50 most abundant genera presented.

<sup>†</sup> These species were added to NCBI taxonomy in year 2020<sup>37</sup> which is after the COPD analysis<sup>35</sup>.
